# Supplementary material for: Combining Time-Driven Activity-Based Costing with Clinical Outcome in Cost-Effectiveness Analysis to Measure Value in Treatment of Depression
Source: PubMed Central journal article supplement (PMC5087942; doi:10.1371/journal.pone.0165389), 2016-10-31
Supplement: pone.0165389.s001.pdf [file pone.0165389.s001.pdf]

| Control Group (2013) |                                                              |           | Intervention Group (2014) |                                                              |           |
|----------------------|--------------------------------------------------------------|-----------|---------------------------|--------------------------------------------------------------|-----------|
| Patient              | Effect (achieved full remission [PHQ-9<5] at post-treatment) | Cost (\$) | Patient                   | Effect (achieved full remission [PHQ-9<5] at post-treatment) | Cost (\$) |
| 1                    | 0                                                            | 708,76    | 1                         | 0                                                            | 734,41    |
| 2                    | 0                                                            | 814,25    | 2                         | 0                                                            | 1342,48   |
| 3                    | 0                                                            | 613,10    | 3                         | 0                                                            | 782,52    |
| 4                    | 0                                                            | 703,24    | 4                         | 0                                                            | 617,32    |
| 5                    | 0                                                            | 669,00    | 5                         | 0                                                            | 657,49    |
| 6                    | 0                                                            | 754,52    | 6                         | 0                                                            | 569,29    |
| 7                    | 0                                                            | 909,57    | 7                         | 0                                                            | 708,28    |
| 8                    | 0                                                            | 636,72    | 8                         | 0                                                            | 576,23    |
| 9                    | 0                                                            | 560,62    | 9                         | 0                                                            | 594,19    |
| 10                   | 0                                                            | 789,36    | 10                        | 0                                                            | 963,62    |
| 11                   | 0                                                            | 625,24    | 11                        | 0                                                            | 610,83    |
| 12                   | 0                                                            | 799,58    | 12                        | 0                                                            | 570,02    |
| 13                   | 0                                                            | 713,88    | 13                        | 0                                                            | 581,33    |
| 14                   | 0                                                            | 733,72    | 14                        | 0                                                            | 688,89    |
| 15                   | 0                                                            | 769,50    | 15                        | 0                                                            | 437,73    |
| 16                   | 0                                                            | 832,22    | 16                        | 0                                                            | 682,30    |
| 17                   | 0                                                            | 826,56    | 17                        | 0                                                            | 551,59    |
| 18                   | 0                                                            | 499,35    | 18                        | 0                                                            | 685,22    |
| 19                   | 0                                                            | 641,05    | 19                        | 0                                                            | 651,53    |
| 20                   | 0                                                            | 647,19    | 20                        | 0                                                            | 672,21    |
| 21                   | 0                                                            | 899,87    | 21                        | 0                                                            | 603,81    |
| 22                   | 0                                                            | 890,46    | 22                        | 0                                                            | 677,75    |
| 23                   | 0                                                            | 781,04    | 23                        | 0                                                            | 822,59    |
| 24                   | 0                                                            | 757,29    | 24                        | 0                                                            | 676,49    |
| 25                   | 0                                                            | 677,49    | 25                        | 0                                                            | 801,96    |
| 26                   | 0                                                            | 683,52    | 26                        | 0                                                            | 795,02    |
| 27                   | 0                                                            | 598,25    | 27                        | 0                                                            | 506,66    |
| 28                   | 0                                                            | 587,63    | 28                        | 0                                                            | 629,39    |
| 29                   | 0                                                            | 482,12    | 29                        | 0                                                            | 480,12    |
| 30                   | 0                                                            | 772,12    | 30                        | 0                                                            | 1136,51   |
| 31                   | 0                                                            | 700,36    | 31                        | 0                                                            | 588,92    |
| 32                   | 0                                                            | 633,95    | 32                        | 0                                                            | 531,47    |
| 33                   | 0                                                            | 571,76    | 33                        | 0                                                            | 620,67    |
| 34                   | 0                                                            | 824,79    | 34                        | 0                                                            | 730,55    |
| 35                   | 0                                                            | 507,14    | 35                        | 0                                                            | 476,75    |
| 36                   | 0                                                            | 847,53    | 36                        | 0                                                            | 732,92    |
| 37                   | 0                                                            | 558,70    | 37                        | 0                                                            | 802,49    |
| 38                   | 0                                                            | 859,05    | 38                        | 0                                                            | 610,87    |
| 39                   | 0                                                            | 528,75    | 39                        | 0                                                            | 567,37    |
| 40                   | 0                                                            | 981,83    | 40                        | 0                                                            | 620,47    |
| 41                   | 0                                                            | 630,06    | 41                        | 0                                                            | 630,78    |
| 42                   | 0                                                            | 541,10    | 42                        | 0                                                            | 686,22    |
| 43                   | 0                                                            | 591,83    | 43                        | 0                                                            | 703,18    |
| 44                   | 0                                                            | 939,40    | 44                        | 0                                                            | 752,44    |
| 45                   | 0                                                            | 912,13    | 45                        | 0                                                            | 559,87    |
| 46                   | 0                                                            | 550,43    | 46                        | 0                                                            | 637,31    |

|    |   |         |  |    |   |        |
|----|---|---------|--|----|---|--------|
| 47 | 0 | 612,53  |  | 47 | 0 | 562,94 |
| 48 | 0 | 601,60  |  | 48 | 0 | 677,58 |
| 49 | 0 | 740,53  |  | 49 | 0 | 753,59 |
| 50 | 0 | 751,75  |  | 50 | 0 | 666,36 |
| 51 | 0 | 801,65  |  | 51 | 0 | 609,96 |
| 52 | 0 | 725,74  |  | 52 | 0 | 727,10 |
| 53 | 0 | 884,78  |  | 53 | 0 | 598,33 |
| 54 | 0 | 662,70  |  | 54 | 0 | 701,20 |
| 55 | 0 | 673,88  |  | 55 | 0 | 464,48 |
| 56 | 0 | 699,69  |  | 56 | 0 | 482,72 |
| 57 | 0 | 818,82  |  | 57 | 0 | 521,08 |
| 58 | 0 | 630,89  |  | 58 | 0 | 617,72 |
| 59 | 0 | 701,53  |  | 59 | 0 | 813,99 |
| 60 | 0 | 742,51  |  | 60 | 0 | 894,80 |
| 61 | 0 | 747,27  |  | 61 | 0 | 477,80 |
| 62 | 0 | 608,03  |  | 62 | 0 | 852,54 |
| 63 | 0 | 519,81  |  | 63 | 0 | 677,95 |
| 64 | 0 | 709,06  |  | 64 | 0 | 902,50 |
| 65 | 0 | 752,62  |  | 65 | 0 | 950,76 |
| 66 | 0 | 616,52  |  | 66 | 0 | 636,52 |
| 67 | 0 | 694,11  |  | 67 | 0 | 680,14 |
| 68 | 0 | 526,23  |  | 68 | 0 | 604,49 |
| 69 | 0 | 724,23  |  | 69 | 0 | 871,14 |
| 70 | 0 | 682,80  |  | 70 | 0 | 565,82 |
| 71 | 0 | 616,92  |  | 71 | 0 | 610,04 |
| 72 | 0 | 684,36  |  | 72 | 0 | 612,41 |
| 73 | 0 | 653,40  |  | 73 | 0 | 904,80 |
| 74 | 0 | 522,61  |  | 74 | 0 | 606,05 |
| 75 | 0 | 654,85  |  | 75 | 0 | 657,96 |
| 76 | 0 | 736,69  |  | 76 | 0 | 660,81 |
| 77 | 0 | 449,69  |  | 77 | 0 | 628,03 |
| 78 | 0 | 723,95  |  | 78 | 0 | 570,30 |
| 79 | 0 | 640,22  |  | 79 | 0 | 564,52 |
| 80 | 0 | 766,53  |  | 80 | 0 | 746,34 |
| 81 | 0 | 757,64  |  | 81 | 0 | 925,20 |
| 82 | 0 | 676,38  |  | 82 | 0 | 650,11 |
| 83 | 0 | 671,13  |  | 83 | 0 | 586,06 |
| 84 | 0 | 859,42  |  | 84 | 0 | 633,19 |
| 85 | 0 | 471,09  |  | 85 | 0 | 646,35 |
| 86 | 0 | 610,67  |  | 86 | 0 | 738,28 |
| 87 | 0 | 612,80  |  | 87 | 0 | 867,83 |
| 88 | 0 | 900,10  |  | 88 | 0 | 516,28 |
| 89 | 0 | 427,31  |  | 89 | 0 | 617,98 |
| 90 | 0 | 447,58  |  | 90 | 0 | 572,52 |
| 91 | 0 |         |  | 91 | 0 | 521,47 |
| 92 | 0 | 1053,76 |  | 92 | 0 | 592,63 |
| 93 | 0 | 605,76  |  | 93 | 0 | 562,36 |
| 94 | 0 | 647,64  |  | 94 | 0 | 559,91 |
| 95 | 0 | 654,92  |  | 95 | 0 | 623,31 |
| 96 | 0 | 547,48  |  | 96 | 0 | 701,07 |

|     |   |        |  |     |   |        |
|-----|---|--------|--|-----|---|--------|
| 97  | 0 | 796,68 |  | 97  | 0 | 568,93 |
| 98  | 0 | 496,81 |  | 98  | 0 | 606,91 |
| 99  | 0 | 635,91 |  | 99  | 0 | 990,80 |
| 100 | 0 | 655,41 |  | 100 | 0 | 530,55 |
| 101 | 0 | 818,61 |  | 101 | 0 | 596,37 |
| 102 | 0 | 622,49 |  | 102 | 0 | 644,07 |
| 103 | 0 | 759,62 |  | 103 | 0 | 563,36 |
| 104 | 0 | 602,22 |  | 104 | 0 | 597,75 |
| 105 | 0 | 803,50 |  | 105 | 0 | 728,04 |
| 106 | 0 | 517,02 |  | 106 | 0 | 565,13 |
| 107 | 0 | 469,85 |  | 107 | 0 | 506,92 |
| 108 | 0 | 541,10 |  | 108 | 0 | 566,61 |
| 109 | 0 | 500,65 |  | 109 | 0 | 400,04 |
| 110 | 0 | 928,64 |  | 110 | 0 | 789,16 |
| 111 | 0 | 852,36 |  | 111 | 0 | 739,09 |
| 112 | 0 | 564,42 |  | 112 | 0 | 558,39 |
| 113 | 0 | 580,14 |  | 113 | 0 | 574,91 |
| 114 | 0 | 684,89 |  | 114 | 0 | 619,17 |
| 115 | 0 | 768,96 |  | 115 | 0 | 695,31 |
| 116 | 0 | 626,69 |  | 116 | 0 | 697,72 |
| 117 | 0 | 585,26 |  | 117 | 0 | 501,18 |
| 118 | 0 | 665,73 |  | 118 | 0 | 607,95 |
| 119 | 0 | 702,06 |  | 119 | 0 | 746,60 |
| 120 | 0 | 731,46 |  | 120 | 0 | 738,51 |
| 121 | 0 | 466,29 |  | 121 | 0 | 511,78 |
| 122 | 0 | 627,14 |  | 122 | 0 | 533,31 |
| 123 | 0 | 559,51 |  | 123 | 0 | 932,32 |
| 124 | 0 | 503,83 |  | 124 | 0 | 992,76 |
| 125 | 0 | 559,04 |  | 125 | 0 | 575,80 |
| 126 | 0 | 504,77 |  | 126 | 0 | 708,32 |
| 127 | 0 | 653,44 |  | 127 | 0 | 737,17 |
| 128 | 0 | 678,25 |  | 128 | 0 | 640,70 |
| 129 | 0 | 481,86 |  | 129 | 0 | 518,91 |
| 130 | 0 | 574,38 |  | 130 | 0 | 680,01 |
| 131 | 0 | 537,37 |  | 131 | 0 | 514,60 |
| 132 | 0 | 788,21 |  | 132 | 0 | 644,49 |
| 133 | 0 | 659,1  |  | 133 | 0 | 553,81 |
| 134 | 0 | 772,36 |  | 134 | 0 | 413,41 |
| 135 | 0 | 931,99 |  | 135 | 0 | 550,73 |
| 136 | 0 | 671,04 |  | 136 | 0 | 788,37 |
| 137 | 0 | 888,17 |  | 137 | 0 | 505,17 |
| 138 | 0 | 579,89 |  | 138 | 0 | 472,21 |
| 139 | 0 | 537,58 |  | 139 | 0 | 565,63 |
| 140 | 0 | 898,91 |  | 140 | 0 | 556,49 |
| 141 | 0 | 500,97 |  | 141 | 0 | 954,11 |
| 142 | 0 | 518,19 |  | 142 | 0 | 577,76 |
| 143 | 0 | 865,13 |  | 143 | 0 | 971,17 |
| 144 | 0 | 509,61 |  | 144 | 0 | 528,76 |
| 145 | 0 | 558,34 |  | 145 | 0 | 498,53 |
| 146 | 0 | 958,85 |  | 146 | 0 | 830,39 |

|     |   |         |  |     |   |        |
|-----|---|---------|--|-----|---|--------|
| 147 | 0 | 969,2   |  | 147 | 0 | 685,99 |
| 148 | 0 | 857,63  |  | 148 | 0 | 575,48 |
| 149 | 0 | 619,16  |  | 149 | 0 | 713,32 |
| 150 | 0 | 995,18  |  | 150 | 0 | 622,76 |
| 151 | 0 | 804,51  |  | 151 | 0 | 427,58 |
| 152 | 0 | 561,43  |  | 152 | 0 | 449,38 |
| 153 | 0 | 749,06  |  | 153 | 0 | 635,43 |
| 154 | 0 | 662,17  |  | 154 | 0 | 641,59 |
| 155 | 0 | 596,95  |  | 155 | 0 | 581,01 |
| 156 | 0 | 599,36  |  | 156 | 0 | 535,89 |
| 157 | 0 | 688,56  |  | 157 | 0 | 604,49 |
| 158 | 0 | 622,98  |  | 158 | 0 | 664,40 |
| 159 | 0 | 680,32  |  | 159 | 0 | 577,06 |
| 160 | 0 | 633,99  |  | 160 | 0 | 528,61 |
| 161 | 0 | 626,76  |  | 161 | 0 | 653,13 |
| 162 | 0 | 604,61  |  | 162 | 0 | 492,07 |
| 163 | 0 | 754,14  |  | 163 | 0 | 574,88 |
| 164 | 0 | 649,18  |  | 164 | 0 | 606,29 |
| 165 | 0 | 668,7   |  | 165 | 0 | 652,71 |
| 166 | 0 | 585,88  |  | 166 | 0 | 477,50 |
| 167 | 0 | 562,48  |  | 167 | 0 | 489,02 |
| 168 | 0 | 828,25  |  | 168 | 0 | 560,44 |
| 169 | 0 | 759,02  |  | 169 | 0 | 575,42 |
| 170 | 0 | 580,4   |  | 170 | 0 | 552,53 |
| 171 | 0 | 622,81  |  | 171 | 0 | 578,53 |
| 172 | 0 | 688,37  |  | 172 | 0 | 711,48 |
| 173 | 0 | 547,25  |  | 173 | 0 | 621,84 |
| 174 | 0 | 458,82  |  | 174 | 0 | 550,76 |
| 175 | 0 | 627,42  |  | 175 | 0 | 632,93 |
| 176 | 0 | 682,88  |  | 176 | 0 | 613,24 |
| 177 | 0 | 531,48  |  | 177 | 0 | 768,42 |
| 178 | 1 | 601,56  |  | 178 | 0 | 547,43 |
| 179 | 1 | 694,02  |  | 179 | 0 | 659,17 |
| 180 | 1 | 586,22  |  | 180 | 0 | 599,20 |
| 181 | 1 | 747,67  |  | 181 | 0 | 595,73 |
| 182 | 1 | 892,25  |  | 182 | 0 | 533,50 |
| 183 | 1 | 810,93  |  | 183 | 0 | 603,07 |
| 184 | 1 | 715,35  |  | 184 | 0 | 540,75 |
| 185 | 1 | 568,77  |  | 185 | 0 | 577,42 |
| 186 | 1 | 667,2   |  | 186 | 0 | 750,12 |
| 187 | 1 | 730,22  |  | 187 | 0 | 611,36 |
| 188 | 1 | 762,8   |  | 188 | 0 | 556,13 |
| 189 | 1 | 579,25  |  | 189 | 0 | 599,84 |
| 190 | 1 | 830,3   |  | 190 | 0 | 657,55 |
| 191 | 1 | 726,06  |  | 191 | 0 | 519,72 |
| 192 | 1 | 832,71  |  | 192 | 0 | 639,99 |
| 193 | 1 | 699,25  |  | 193 | 0 | 523,17 |
| 194 | 1 | 1193,31 |  | 194 | 0 | 945,38 |
| 195 | 1 | 1141,34 |  | 195 | 0 | 450,57 |
| 196 | 1 | 644,78  |  | 196 | 0 | 624,76 |

|     |   |         |  |     |   |         |
|-----|---|---------|--|-----|---|---------|
| 197 | 1 | 801,24  |  | 197 | 0 | 561,98  |
| 198 | 1 | 739,65  |  | 198 | 0 | 983,31  |
| 199 | 1 | 740,36  |  | 199 | 0 | 558,16  |
| 200 | 1 | 518,55  |  | 200 | 0 | 713,64  |
| 201 | 1 | 865,45  |  | 201 | 0 | 666,02  |
| 202 | 1 | 670,89  |  | 202 | 0 | 532,11  |
| 203 | 1 | 579,63  |  | 203 | 0 | 885,99  |
| 204 | 1 | 739,37  |  | 204 | 0 | 588,13  |
| 205 | 1 | 722,93  |  | 205 | 0 | 779,77  |
| 206 | 1 | 543,17  |  | 206 | 0 | 475,32  |
| 207 | 1 | 801,92  |  | 207 | 0 | 407,42  |
| 208 | 1 | 843,44  |  | 208 | 0 | 503,44  |
| 209 | 1 | 889,48  |  | 209 | 0 | 620,62  |
| 210 | 1 | 641,31  |  | 210 | 0 | 638,14  |
| 211 | 1 | 783,64  |  | 211 | 0 | 511,52  |
| 212 | 1 | 625,92  |  | 212 | 0 | 548,22  |
| 213 | 1 | 490,39  |  | 213 | 0 | 461,01  |
| 214 | 1 | 909,57  |  | 214 | 0 | 764,73  |
| 215 | 1 | 732,74  |  | 215 | 0 | 473,96  |
| 216 | 1 | 729,03  |  | 216 | 0 | 742,03  |
| 217 | 1 | 520,43  |  | 217 | 0 | 742,39  |
| 218 | 1 | 567,21  |  | 218 | 0 | 464,51  |
| 219 | 1 | 882,27  |  | 219 | 0 | 722,53  |
| 220 | 1 | 535,83  |  | 220 | 0 | 921,57  |
| 221 | 1 | 843,29  |  | 221 | 0 | 891,09  |
| 222 | 1 | 505,82  |  | 222 | 0 | 866,87  |
| 223 | 1 | 613,55  |  | 223 | 0 | 490,19  |
| 224 | 1 | 569,56  |  | 224 | 0 | 531,53  |
| 225 | 1 | 558,15  |  | 225 | 0 | 847,44  |
| 226 | 1 | 551,83  |  | 226 | 0 | 601,42  |
| 227 | 1 | 663,24  |  | 227 | 0 | 489,21  |
| 228 | 1 | 614,68  |  | 228 | 0 | 1511,03 |
| 229 | 1 | 658,48  |  | 229 | 0 | 434,64  |
| 230 | 1 | 549,25  |  | 230 | 0 | 538,32  |
| 231 | 1 | 512,32  |  | 231 | 0 | 445,58  |
| 232 | 1 | 1014,92 |  | 232 | 0 | 545,12  |
| 233 | 1 | 530,56  |  | 233 | 0 | 533,67  |
| 234 | 1 | 639,6   |  | 234 | 0 | 674,89  |
| 235 | 1 | 510,96  |  | 235 | 0 | 688,59  |
| 236 | 1 | 468,06  |  | 236 | 0 | 1030,37 |
| 237 | 1 | 560,6   |  | 237 | 1 | 905,74  |
| 238 | 1 | 652,1   |  | 238 | 1 | 581,45  |
| 239 | 1 | 588,85  |  | 239 | 1 | 679,84  |
| 240 | 1 | 724,25  |  | 240 | 1 | 607,93  |
| 241 | 1 | 553,05  |  | 241 | 1 | 753,53  |
| 242 | 1 | 700,14  |  | 242 | 1 | 525,45  |
| 243 | 1 | 602,63  |  | 243 | 1 | 531,94  |
|     |   |         |  | 244 | 1 | 571,68  |
|     |   |         |  | 245 | 1 | 621,05  |
|     |   |         |  | 246 | 1 | 682,55  |

|  |  |  |  |     |   |        |
|--|--|--|--|-----|---|--------|
|  |  |  |  | 247 | 1 | 705,21 |
|  |  |  |  | 248 | 1 | 555,75 |
|  |  |  |  | 249 | 1 | 590,37 |
|  |  |  |  | 250 | 1 | 588,67 |
|  |  |  |  | 251 | 1 | 616,87 |
|  |  |  |  | 252 | 1 | 589,18 |
|  |  |  |  | 253 | 1 | 606,78 |
|  |  |  |  | 254 | 1 | 639,87 |
|  |  |  |  | 255 | 1 | 529,21 |
|  |  |  |  | 256 | 1 | 715,85 |
|  |  |  |  | 257 | 1 | 619,92 |
|  |  |  |  | 258 | 1 | 606,95 |
|  |  |  |  | 259 | 1 | 695,55 |
|  |  |  |  | 260 | 1 | 562,53 |
|  |  |  |  | 261 | 1 | 771,21 |
|  |  |  |  | 262 | 1 | 697,15 |
|  |  |  |  | 263 | 1 | 579,77 |
|  |  |  |  | 264 | 1 | 928,95 |
|  |  |  |  | 265 | 1 | 602,53 |
|  |  |  |  | 266 | 1 | 680,25 |
|  |  |  |  | 267 | 1 | 541,95 |
|  |  |  |  | 268 | 1 | 658,30 |
|  |  |  |  | 269 | 1 | 606,37 |
|  |  |  |  | 270 | 1 | 596,03 |
|  |  |  |  | 271 | 1 | 407,52 |
|  |  |  |  | 272 | 1 | 704,74 |
|  |  |  |  | 273 | 1 | 567,84 |
|  |  |  |  | 274 | 1 | 463,08 |
|  |  |  |  | 275 | 1 | 535,48 |
|  |  |  |  | 276 | 1 | 643,09 |
|  |  |  |  | 277 | 1 | 638,39 |
|  |  |  |  | 278 | 1 | 396,90 |
|  |  |  |  | 279 | 1 | 468,47 |
|  |  |  |  | 280 | 1 | 593,79 |
|  |  |  |  | 281 | 1 | 673,74 |
|  |  |  |  | 282 | 1 | 558,82 |
|  |  |  |  | 283 | 1 | 520,80 |
|  |  |  |  | 284 | 1 | 509,16 |
|  |  |  |  | 285 | 1 | 751,55 |
|  |  |  |  | 286 | 1 | 634,32 |
|  |  |  |  | 287 | 1 | 537,74 |
|  |  |  |  | 288 | 1 | 540,05 |
|  |  |  |  | 289 | 1 | 819,04 |
|  |  |  |  | 290 | 1 | 499,62 |
|  |  |  |  | 291 | 1 | 772,41 |
|  |  |  |  | 292 | 1 | 811,39 |
|  |  |  |  | 293 | 1 | 651,07 |
|  |  |  |  | 294 | 1 | 637,48 |
|  |  |  |  | 295 | 1 | 596,49 |
|  |  |  |  | 296 | 1 | 628,37 |

|  |             |               |     |             |               |
|--|-------------|---------------|-----|-------------|---------------|
|  |             |               | 297 | 1           | 531,17        |
|  |             |               | 298 | 1           | 581,05        |
|  |             |               | 299 | 1           | 584,10        |
|  |             |               | 300 | 1           | 635,47        |
|  |             |               | 301 | 1           | 619,81        |
|  |             |               | 302 | 1           | 597,82        |
|  |             |               | 303 | 1           | 613,48        |
|  |             |               | 304 | 1           | 633,10        |
|  |             |               | 305 | 1           | 532,22        |
|  |             |               | 306 | 1           | 591,35        |
|  |             |               | 307 | 1           | 710,69        |
|  |             |               | 308 | 1           | 442,55        |
|  |             |               | 309 | 1           | 700,09        |
|  |             |               | 310 | 1           | 430,41        |
|  |             |               | 311 | 1           | 477,31        |
|  |             |               | 312 | 1           | 461,97        |
|  |             |               | 313 | 1           | 819,98        |
|  |             |               | 314 | 1           | 712,74        |
|  |             |               | 315 | 1           | 444,86        |
|  |             |               | 316 | 1           | 575,78        |
|  |             |               | 317 | 1           | 1271,91       |
|  |             |               | 318 | 1           | 1731,32       |
|  |             |               | 319 | 1           | 603,28        |
|  |             |               | 320 | 1           | 672,87        |
|  |             |               | 321 | 1           | 458,17        |
|  |             |               | 322 | 1           | 806,67        |
|  |             |               | 323 | 1           | 1256,83       |
|  |             |               | 324 | 1           | 718,29        |
|  |             |               | 325 | 1           | 869,43        |
|  | <b>Mean</b> | <b>Mean</b>   |     | <b>Mean</b> | <b>Mean</b>   |
|  | <b>,27</b>  | <b>680,07</b> |     | <b>,27</b>  | <b>645,56</b> |
