# Supplementary material for: Combining Time-Driven Activity-Based Costing with Clinical Outcome in Cost-Effectiveness Analysis to Measure Value in Treatment of Depression
Source: PubMed Central journal article supplement (PMC5087942; doi:10.1371/journal.pone.0165389), 2016-10-31
Supplement: pone.0165389.s002.pdf [file pone.0165389.s002.pdf]

| Control Group (2013) |                                                         |           | Intervention Group (2014) |                                                        |           |
|----------------------|---------------------------------------------------------|-----------|---------------------------|--------------------------------------------------------|-----------|
| Patient              | Effect (achieved full remission [PHQ-9<5] at follow-up) | Cost (\$) | Patient                   | Effect achieved full remission [PHQ-9<5] at follow-up) | Cost (\$) |
| 1                    | 0                                                       | 708,76    | 1                         | 0                                                      | 734,41    |
| 2                    | 0                                                       | 814,25    | 2                         | 0                                                      | 1342,48   |
| 3                    | 0                                                       | 703,24    | 3                         | 0                                                      | 657,49    |
| 4                    | 0                                                       | 754,52    | 4                         | 0                                                      | 569,29    |
| 5                    | 0                                                       | 909,57    | 5                         | 0                                                      | 905,74    |
| 6                    | 0                                                       | 560,62    | 6                         | 0                                                      | 594,19    |
| 7                    | 0                                                       | 789,36    | 7                         | 0                                                      | 963,62    |
| 8                    | 0                                                       | 625,24    | 8                         | 0                                                      | 688,89    |
| 9                    | 0                                                       | 733,72    | 9                         | 0                                                      | 437,73    |
| 10                   | 0                                                       | 769,50    | 10                        | 0                                                      | 607,93    |
| 11                   | 0                                                       | 892,25    | 11                        | 0                                                      | 551,59    |
| 12                   | 0                                                       | 832,22    | 12                        | 0                                                      | 603,81    |
| 13                   | 0                                                       | 810,93    | 13                        | 0                                                      | 676,49    |
| 14                   | 0                                                       | 826,56    | 14                        | 0                                                      | 801,96    |
| 15                   | 0                                                       | 499,35    | 15                        | 0                                                      | 795,02    |
| 16                   | 0                                                       | 641,05    | 16                        | 0                                                      | 506,66    |
| 17                   | 0                                                       | 667,20    | 17                        | 0                                                      | 629,39    |
| 18                   | 0                                                       | 899,87    | 18                        | 0                                                      | 682,55    |
| 19                   | 0                                                       | 890,46    | 19                        | 0                                                      | 555,75    |
| 20                   | 0                                                       | 781,04    | 20                        | 0                                                      | 480,12    |
| 21                   | 0                                                       | 757,29    | 21                        | 0                                                      | 1136,51   |
| 22                   | 0                                                       | 677,49    | 22                        | 0                                                      | 531,47    |
| 23                   | 0                                                       | 598,25    | 23                        | 0                                                      | 476,75    |
| 24                   | 0                                                       | 587,63    | 24                        | 0                                                      | 732,92    |
| 25                   | 0                                                       | 772,12    | 25                        | 0                                                      | 802,49    |
| 26                   | 0                                                       | 700,36    | 26                        | 0                                                      | 610,87    |
| 27                   | 0                                                       | 633,95    | 27                        | 0                                                      | 620,47    |
| 28                   | 0                                                       | 507,14    | 28                        | 0                                                      | 616,87    |
| 29                   | 0                                                       | 726,06    | 29                        | 0                                                      | 589,18    |
| 30                   | 0                                                       | 859,05    | 30                        | 0                                                      | 630,78    |
| 31                   | 0                                                       | 1193,31   | 31                        | 0                                                      | 686,22    |
| 32                   | 0                                                       | 1141,34   | 32                        | 0                                                      | 703,18    |
| 33                   | 0                                                       | 528,75    | 33                        | 0                                                      | 639,87    |
| 34                   | 0                                                       | 981,83    | 34                        | 0                                                      | 752,44    |
| 35                   | 0                                                       | 630,06    | 35                        | 0                                                      | 559,87    |
| 36                   | 0                                                       | 541,10    | 36                        | 0                                                      | 637,31    |
| 37                   | 0                                                       | 591,83    | 37                        | 0                                                      | 562,94    |
| 38                   | 0                                                       | 939,40    | 38                        | 0                                                      | 562,53    |
| 39                   | 0                                                       | 912,13    | 39                        | 0                                                      | 753,59    |
| 40                   | 0                                                       | 612,53    | 40                        | 0                                                      | 666,36    |
| 41                   | 0                                                       | 601,60    | 41                        | 0                                                      | 727,10    |
| 42                   | 0                                                       | 740,53    | 42                        | 0                                                      | 598,33    |
| 43                   | 0                                                       | 751,75    | 43                        | 0                                                      | 697,15    |
| 44                   | 0                                                       | 801,65    | 44                        | 0                                                      | 701,20    |
| 45                   | 0                                                       | 725,74    | 45                        | 0                                                      | 521,08    |
| 46                   | 0                                                       | 662,70    | 46                        | 0                                                      | 813,99    |

|    |   |        |    |   |        |
|----|---|--------|----|---|--------|
| 47 | 0 | 699,69 | 47 | 0 | 477,80 |
| 48 | 0 | 747,27 | 48 | 0 | 852,54 |
| 49 | 0 | 608,03 | 49 | 0 | 677,95 |
| 50 | 0 | 519,81 | 50 | 0 | 680,25 |
| 51 | 0 | 752,62 | 51 | 0 | 902,50 |
| 52 | 0 | 616,52 | 52 | 0 | 636,52 |
| 53 | 0 | 694,11 | 53 | 0 | 541,95 |
| 54 | 0 | 526,23 | 54 | 0 | 604,49 |
| 55 | 0 | 724,23 | 55 | 0 | 871,14 |
| 56 | 0 | 682,80 | 56 | 0 | 610,04 |
| 57 | 0 | 684,36 | 57 | 0 | 612,41 |
| 58 | 0 | 653,40 | 58 | 0 | 904,80 |
| 59 | 0 | 522,61 | 59 | 0 | 606,05 |
| 60 | 0 | 843,44 | 60 | 0 | 657,96 |
| 61 | 0 | 654,85 | 61 | 0 | 660,81 |
| 62 | 0 | 736,69 | 62 | 0 | 628,03 |
| 63 | 0 | 900,10 | 63 | 0 | 606,37 |
| 64 | 0 | 647,64 | 64 | 0 | 570,30 |
| 65 | 0 | 626,69 | 65 | 0 | 564,52 |
| 66 | 0 | 671,04 | 66 | 0 | 407,52 |
| 67 | 0 | 561,43 | 67 | 0 | 650,11 |
| 68 | 0 | 599,36 | 68 | 0 | 567,84 |
| 69 | 0 | 626,76 | 69 | 0 | 586,06 |
| 70 | 0 | 649,18 | 70 | 0 | 597,75 |
| 71 | 0 | 585,88 | 71 | 0 | 932,32 |
| 72 | 1 | 613,10 | 72 | 0 | 641,59 |
| 73 | 1 | 669,00 | 73 | 0 | 581,01 |
| 74 | 1 | 636,72 | 74 | 0 | 604,49 |
| 75 | 1 | 601,56 | 75 | 0 | 653,13 |
| 76 | 1 | 799,58 | 76 | 0 | 619,81 |
| 77 | 1 | 713,88 | 77 | 0 | 750,12 |
| 78 | 1 | 694,02 | 78 | 0 | 742,03 |
| 79 | 1 | 586,22 | 79 | 1 | 782,52 |
| 80 | 1 | 747,67 | 80 | 1 | 617,32 |
| 81 | 1 | 715,35 | 81 | 1 | 708,28 |
| 82 | 1 | 568,77 | 82 | 1 | 576,23 |
| 83 | 1 | 647,19 | 83 | 1 | 610,83 |
| 84 | 1 | 730,22 | 84 | 1 | 570,02 |
| 85 | 1 | 683,52 | 85 | 1 | 581,45 |
| 86 | 1 | 762,80 | 86 | 1 | 581,33 |
| 87 | 1 | 482,12 | 87 | 1 | 679,84 |
| 88 | 1 | 579,25 | 88 | 1 | 682,30 |
| 89 | 1 | 733,91 | 89 | 1 | 685,22 |
| 90 | 1 | 830,30 | 90 | 1 | 753,53 |
| 91 | 1 | 571,76 | 91 | 1 | 651,53 |
| 92 | 1 | 824,79 | 92 | 1 | 672,21 |
| 93 | 1 | 847,53 | 93 | 1 | 525,45 |
| 94 | 1 | 832,71 | 94 | 1 | 677,75 |
| 95 | 1 | 558,70 | 95 | 1 | 822,59 |
| 96 | 1 | 699,25 | 96 | 1 | 531,94 |

|     |             |               |     |             |               |
|-----|-------------|---------------|-----|-------------|---------------|
| 97  | 1           | 644,78        | 97  | 1           | 571,68        |
| 98  | 1           | 801,24        | 98  | 1           | 621,05        |
| 99  | 1           | 550,43        | 99  | 1           | 705,21        |
| 100 | 1           | 739,65        | 100 | 1           | 588,92        |
| 101 | 1           | 884,78        | 101 | 1           | 620,67        |
| 102 | 1           | 740,36        | 102 | 1           | 479,33        |
| 103 | 1           | 673,88        | 103 | 1           | 730,55        |
| 104 | 1           | 818,82        | 104 | 1           | 590,37        |
| 105 | 1           | 630,89        | 105 | 1           | 588,67        |
| 106 | 1           | 701,53        | 106 | 1           | 567,37        |
| 107 | 1           | 742,51        | 107 | 1           | 606,78        |
| 108 | 1           | 518,55        | 108 | 1           | 529,21        |
| 109 | 1           | 865,45        | 109 | 1           | 715,85        |
| 110 | 1           | 709,06        | 110 | 1           | 619,92        |
| 111 | 1           | 670,89        | 111 | 1           | 606,95        |
| 112 | 1           | 579,63        | 112 | 1           | 695,55        |
| 113 | 1           | 739,37        | 113 | 1           | 677,58        |
| 114 | 1           | 722,93        | 114 | 1           | 771,21        |
| 115 | 1           | 543,17        | 115 | 1           | 609,96        |
| 116 | 1           | 616,92        | 116 | 1           | 579,77        |
| 117 | 1           | 801,92        | 117 | 1           | 464,48        |
| 118 | 1           | 889,48        | 118 | 1           | 482,72        |
| 119 | 1           | 641,31        | 119 | 1           | 928,95        |
| 120 | 1           | 882,27        | 120 | 1           | 602,53        |
| 121 | 1           | 995,18        | 121 | 1           | 617,72        |
| 122 | 1           | 409,86        | 122 | 1           | 894,80        |
| 123 | 1           | 724,25        | 123 | 1           | 950,76        |
|     |             |               | 124 | 1           | 680,14        |
|     |             |               | 125 | 1           | 658,30        |
|     |             |               | 126 | 1           | 565,82        |
|     |             |               | 127 | 1           | 746,34        |
|     |             |               | 128 | 1           | 596,03        |
|     |             |               | 129 | 1           | 925,20        |
|     |             |               | 130 | 1           | 704,74        |
|     |             |               | 131 | 1           | 701,07        |
|     |             |               | 132 | 1           | 664,40        |
|     |             |               | 133 | 1           | 633,10        |
|     |             |               | 134 | 1           | 430,41        |
|     |             |               | 135 | 1           | 477,31        |
|     | <b>Mean</b> | <b>Mean</b>   |     | <b>Mean</b> | <b>Mean</b>   |
|     | <b>,42</b>  | <b>708,85</b> |     | <b>,42</b>  | <b>659,47</b> |
